# Supplementary material for: Effects of interdisciplinary teamwork on patient-reported experience of cancer care
Source: Springer Nature journal article supplement (doi:10.1186/s12913-017-2166-7), 2017-03-20
Supplement: MOESM1 [file 12157726]

**Additional File 1: ITW tool components and Patient-Reported Experience Measures questionnaire items**

**Table S1** ITW tool components

| <b>Dimension and items</b>                                                              | <b>Criteria</b>                                                                                                                                              | <b>Quantification<sup>a</sup></b> |
|-----------------------------------------------------------------------------------------|--------------------------------------------------------------------------------------------------------------------------------------------------------------|-----------------------------------|
| <i><b>Team structure</b></i>                                                            |                                                                                                                                                              |                                   |
| <b>Composition of the team<sup>b</sup></b>                                              | • $\geq 6$ members / 8 = 3; < 6 members / 8 = 0                                                                                                              | 0 to 3                            |
| <b>Team meeting</b>                                                                     |                                                                                                                                                              | 0 to 3                            |
| • Formal meeting schedule                                                               | • Yes = 1,5; No = 0                                                                                                                                          |                                   |
| • Frequency                                                                             | • $\leq$ monthly = 1.5; > 1 monthly = 0                                                                                                                      |                                   |
| <i><b>Team processes</b></i>                                                            |                                                                                                                                                              |                                   |
| <b>Shared philosophy among team members</b>                                             | • Seeking team tasks to be performed<br>Yes = 1; No = 0                                                                                                      | 0 to 1                            |
| <b>Coordination mechanisms and tools</b>                                                |                                                                                                                                                              | 0 to 3                            |
| • Clear professional roles with reference criteria                                      | • Access to written referral criteria to various team members<br>Yes = 1; No = 0                                                                             |                                   |
| • Patient's needs assessment tools                                                      | • Ongoing utilization of assessment tools<br>Yes = 1; No = 0                                                                                                 |                                   |
| • Interdisciplinary care plan                                                           | • Written and shared care plans<br>Yes = 1; No = 0                                                                                                           |                                   |
| <b>Leadership, responsibilities, and processes shared among clinicians and managers</b> | • Identified oncology-related medical leader<br>Yes = 1; No = 0<br>• Identified first-line manager with clinical expertise in cancer care<br>Yes = 1; No = 0 | 0 to 2                            |
| <b>Quality assessment activities</b>                                                    |                                                                                                                                                              | 0 to 10                           |
| • Continuing education                                                                  | • Regular activity program = 2<br>Occasionally = 1; None = 0                                                                                                 |                                   |
| • Backup behaviors (support between teams members)                                      | • Planned co-development and debriefing = 2; Occasionally = 1; None = 0                                                                                      |                                   |
| • Identified quality manager                                                            | • Yes = 2; No = 0                                                                                                                                            |                                   |
| • Regular patient satisfaction survey                                                   | • Yes = 2; No = 0                                                                                                                                            |                                   |
| • Team effectiveness evaluation                                                         | • Regular activity program = 2;<br>Occasionally = 1; None = 0                                                                                                |                                   |

<sup>a</sup> Transformation for a total of 0 to 10 ITW intensity score

<sup>b</sup> According to Cancer directorate, Ministry of Health

**Table S2** Six dimensions of the Patient-Reported Experience Measures questionnaire items

| <i>Item</i>                                          | <i>Question: In the past 12 months...</i>                                                                                                    |
|------------------------------------------------------|----------------------------------------------------------------------------------------------------------------------------------------------|
| <b>Prompt access to care</b>                         |                                                                                                                                              |
| 1                                                    | On weekdays it was possible to contact a professional at the cancer clinic by phone when needed                                              |
| 2                                                    | On weekdays it was possible to consult the cancer clinic on the same day in cases of emergency or complications                              |
| 3                                                    | During evenings, at night and on weekends it was possible to contact a hospital professional by phone in cases of emergency or complications |
| 4                                                    | The amount of time spent in the waiting room before a consultation was reasonable                                                            |
| <b>Person-centred response</b>                       |                                                                                                                                              |
| 5                                                    | Professionals provided you with the information you needed within a reasonable time given your health status                                 |
| 6                                                    | Professionals asked for your consent before beginning a treatment or test                                                                    |
| 7                                                    | Professionals addressed all your needs                                                                                                       |
| 8                                                    | The confidentiality of your personal information was respected                                                                               |
| 9                                                    | Your close relatives were encouraged to be present as much as you wanted                                                                     |
| <b>Quality of patient-professional communication</b> |                                                                                                                                              |
| 10                                                   | Professionals listened to you attentively                                                                                                    |
| 11                                                   | Professionals gave you simple explanations that were easy to understand                                                                      |
| 12                                                   | Professionals provided you with enough time to ask all the questions you had about your illness and treatments                               |
| 13                                                   | Professionals encouraged you to participate as much as you wanted in decisions regarding your care, treatment and tests                      |
| 14                                                   | Professionals helped you assess the "pros" and "cons" regarding care, treatment and tests                                                    |
| <b>Quality of care environment</b>                   |                                                                                                                                              |
| 15                                                   | Professionals treated you with respect                                                                                                       |
| 16                                                   | The waiting room was comfortable                                                                                                             |
| 17                                                   | The administrative staff treated you respectfully                                                                                            |
| 18                                                   | Tests and treatments were conducted in a way that respected your physical privacy                                                            |
| 19                                                   | You were able to speak privately with the professionals at the clinic                                                                        |
| <b>Continuity of care</b>                            |                                                                                                                                              |
| 20                                                   | The information about your cancer and treatments was sent to your family doctor                                                              |

| <i>Item</i>            | <i>Question: In the past 12 months...</i>                                                                                      |
|------------------------|--------------------------------------------------------------------------------------------------------------------------------|
| 21                     | You were informed of the different steps in your treatment and care                                                            |
| 22                     | Someone helped you obtain the care you needed                                                                                  |
| 23                     | At least one professional was well informed about your situation                                                               |
| 24                     | The professionals gave you contradictory information                                                                           |
| 25                     | One of the professionals consulted was not aware of your recent medical history                                                |
| 26                     | You had to redo tests                                                                                                          |
| 27                     | A professional you consulted was not aware of the treatment changes recommended by another professional                        |
| 28                     | You had to repeat information that should have been in your medical file                                                       |
| <b>Results of care</b> |                                                                                                                                |
| 29                     | Professionals helped you control your pain and symptoms                                                                        |
| 30                     | Professionals helped you manage your emotions and stress regarding your illness                                                |
| 31                     | Professionals motivated you to adopt or maintain good lifestyle habits such as eating healthy, exercising and quitting smoking |
| 32                     | Professionals encouraged you to follow your treatments                                                                         |
| 33                     | Professionals met your overall needs                                                                                           |

**Table S3** Questionnaire items measuring sociodemographic, clinical, and organizational characteristics

| <i>Item</i>                                       | <i>Variable</i>                       | <i>Operationalization</i>                                                                           |
|---------------------------------------------------|---------------------------------------|-----------------------------------------------------------------------------------------------------|
| <b>Patients' sociodemographic characteristics</b> |                                       |                                                                                                     |
| 1                                                 | Age                                   | 18-49 years; 50-69 years; 70 years and older                                                        |
| 2                                                 | Sex                                   | Male; Female                                                                                        |
| 3                                                 | Education level (completed)           | Primary ; Secondary; Business college/CEGEP**; University                                           |
| 4                                                 | Self-assessed health status           | Poor; Good                                                                                          |
| 5                                                 | Emotional distress*                   | Low; High                                                                                           |
| <b>Patients' clinical characteristics</b>         |                                       |                                                                                                     |
| 6                                                 | Time since diagnosis                  | < 1 year; 1-3 years; ≥ 3 years                                                                      |
| 7                                                 | Cancer type                           | Colorectal, female genital, prostate, hematopoietic, breast, head and neck, bronchopulmonary, other |
| 8                                                 | Treatment type (in the past 12 month) | Chemotherapy; radiotherapy; surgery; other; none                                                    |
| 19                                                | Comorbidities                         | No comorbidity; 1-3 comorbidities; more than 3 comorbidities                                        |
| <b>Organizational characteristics</b>             |                                       |                                                                                                     |
| 10                                                | Mandate                               | Local mandate; regional mandate                                                                     |
| 11                                                | Academic affiliation                  | University hospital; community hospital                                                             |
| 12                                                | Geographic location                   | Urban; semi-rural; rural                                                                            |
| 13                                                | Cancer team size and diversity        | Cancer team with 8 professionals from different disciplines and more = large; fewer than 8 = small) |

\* Emotional distress (6 items)

\*\* In Quebec, Business college/CEGEP are post-secondary institutions that provide pre-university education (2 years) or specialized vocational programs (3 years)
